# Supplementary material for: Evaluation of random forests and Prophet for daily streamflow forecasting
Source: Copernicus journal article supplement (doi:10.5194/adgeo-45-201-2018), 2018-08-27
Supplement: Supplementary file 1 [file adgeo-45-201-2018-supplement.pdf]

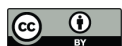

*Supplement of*

## **Evaluation of random forests and Prophet for daily streamflow forecasting**

**Georgia A. Papacharalampous and Hristos Tyrallis**

*Correspondence to:* Georgia A. Papacharalampous ([papacharalampous.georgia@gmail.com](mailto:papacharalampous.georgia@gmail.com))

The copyright of individual parts of the supplement might differ from the CC BY 4.0 License.

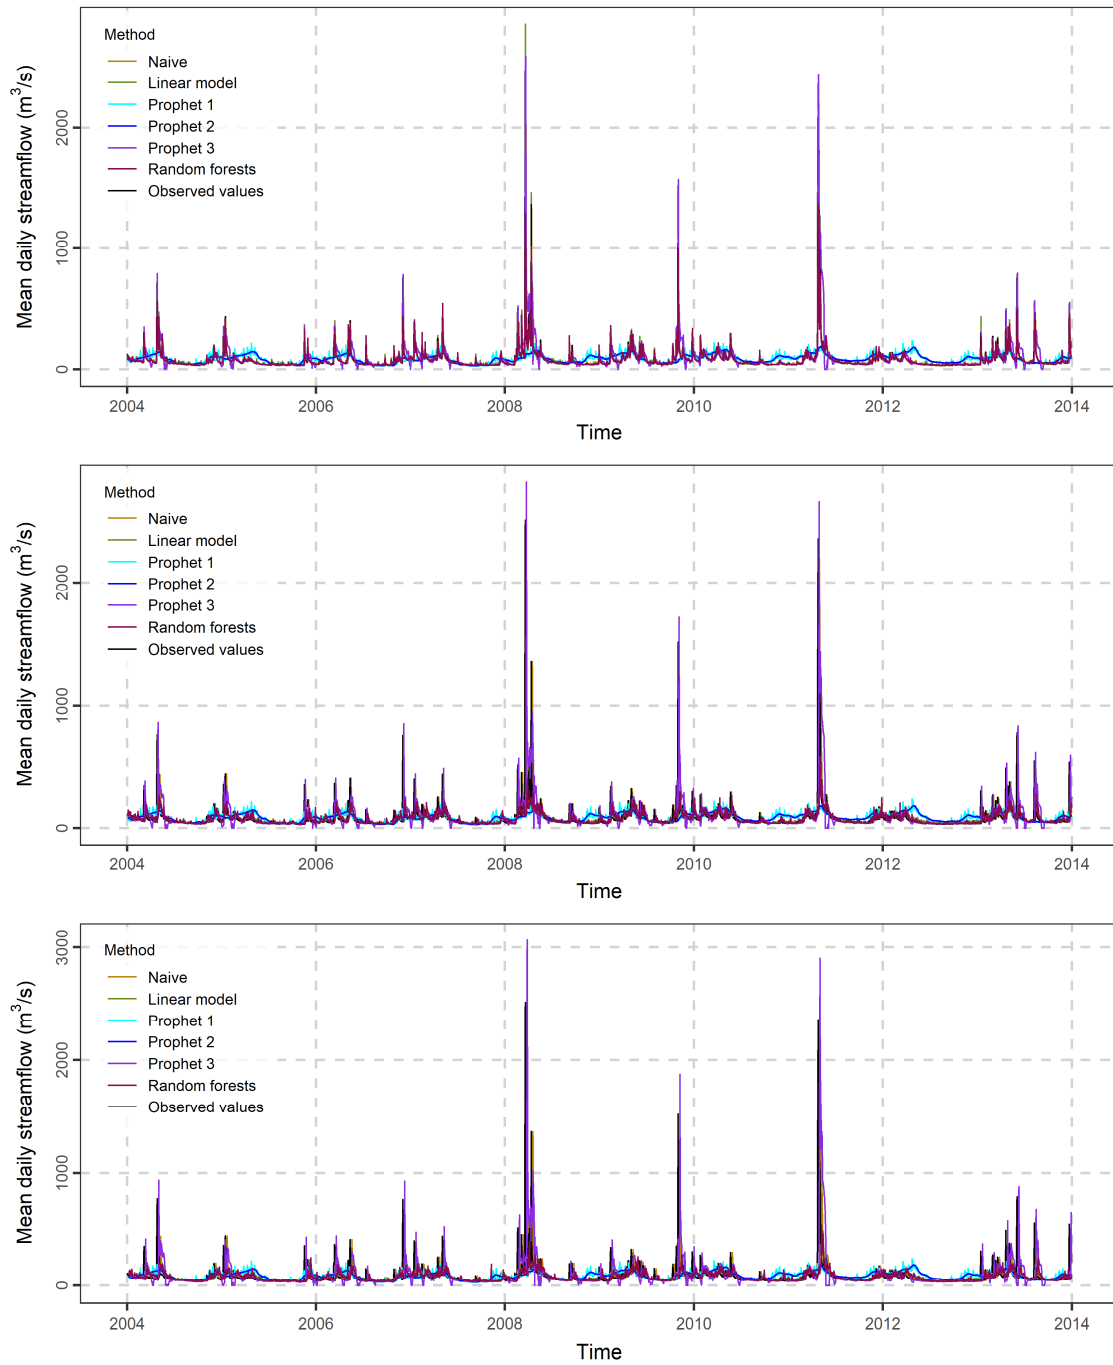

Figure S.1. 1-, 4- and 7-step ahead forecasts (from top to bottom) of the Current river daily streamflow in the period 2004-2013.

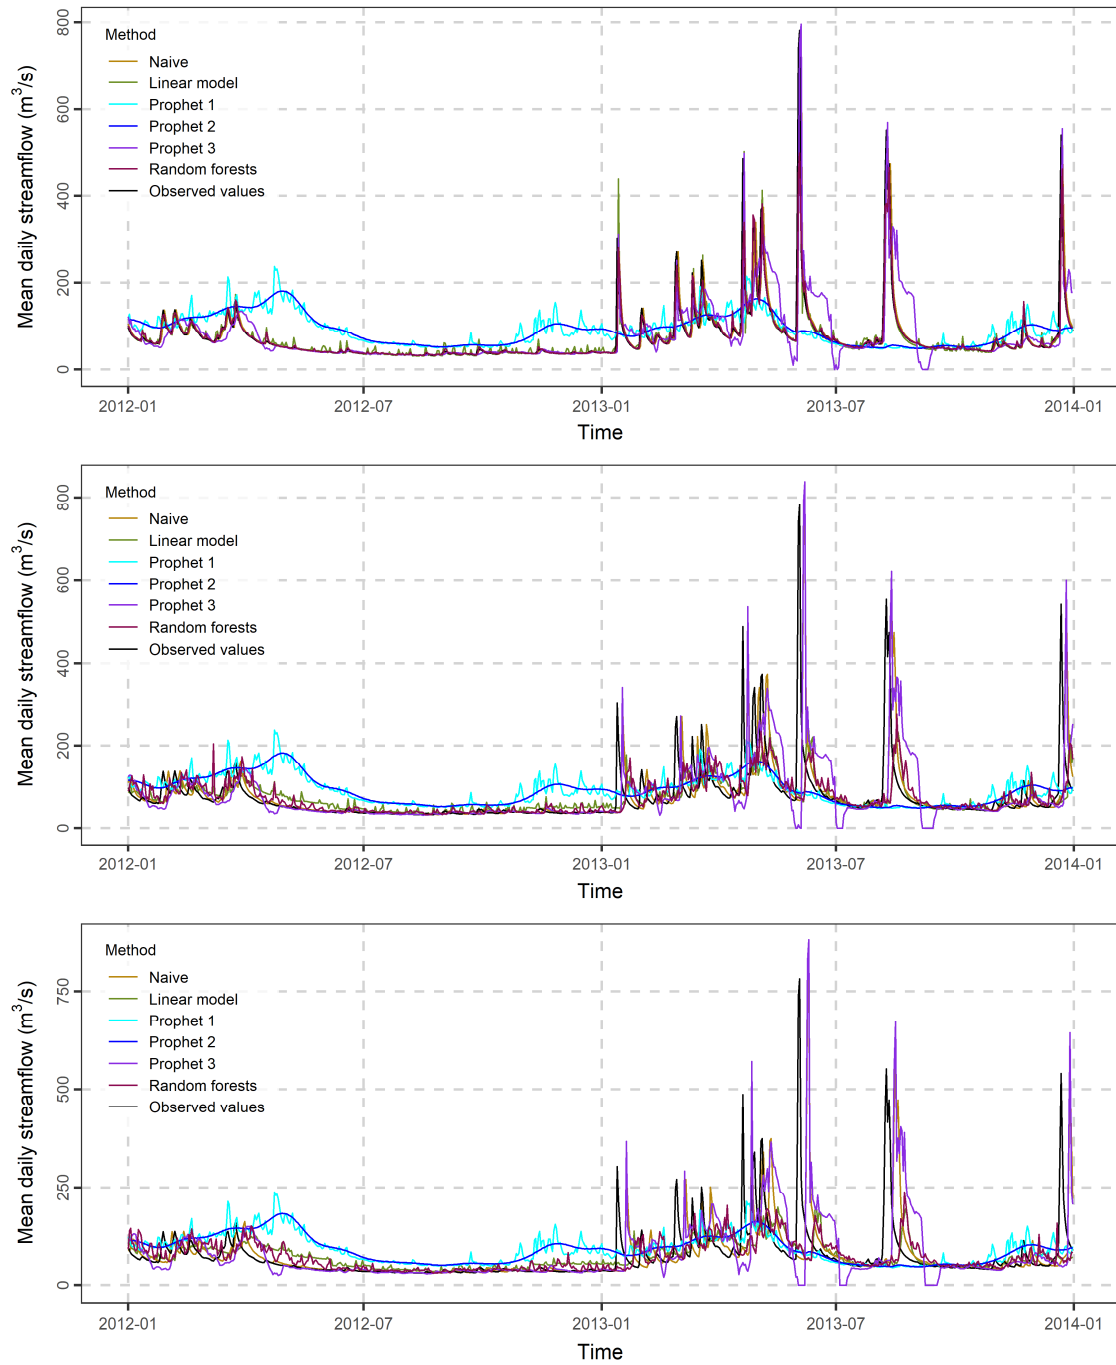

Figure S.2. 1-, 4- and 7-step ahead forecasts (from top to bottom) of the Current river daily streamflow in the period 2012-2013.
